# Supplementary material for: New prospects for the synthesis of N-alkyl phosphonate/phosphonic acid-bearing oligo-chitosan
Source: Royal Society of Chemistry journal article supplement (doi:10.1039/c4ra02501f), 2014-01-01
Supplement: c4ra02501f1.pdf [file c4ra02501f1.pdf]

Supplementary Information

New prospects for the synthesis of N-alkyl  
phosphonate/phosphonic acid-bearing oligo-chitosan

Cite this: DOI: 10.1039/x0xx00000x

N. Illy, G. Couture, R. Auvergne, S. Caillol, G. David and B. Boutevin

Received 00th January 2012,  
Accepted 00th January 2012

DOI: 10.1039/x0xx00000x

www.rsc.org/

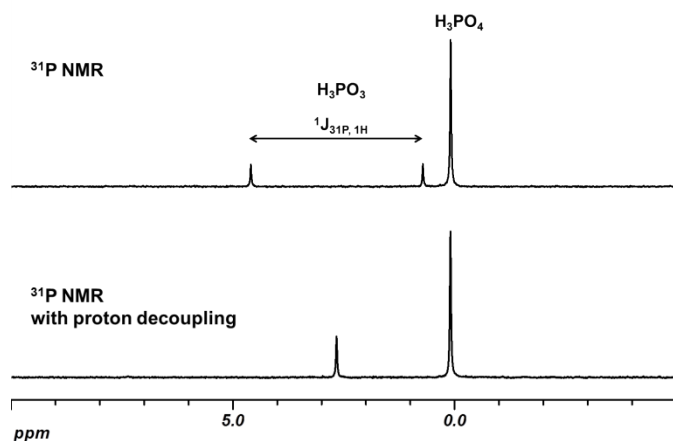

Figure S1:  $^{31}\text{P}$ -NMR spectra of compound (I) (run 2) in  $\text{D}_2\text{O}$  at 25 °C.

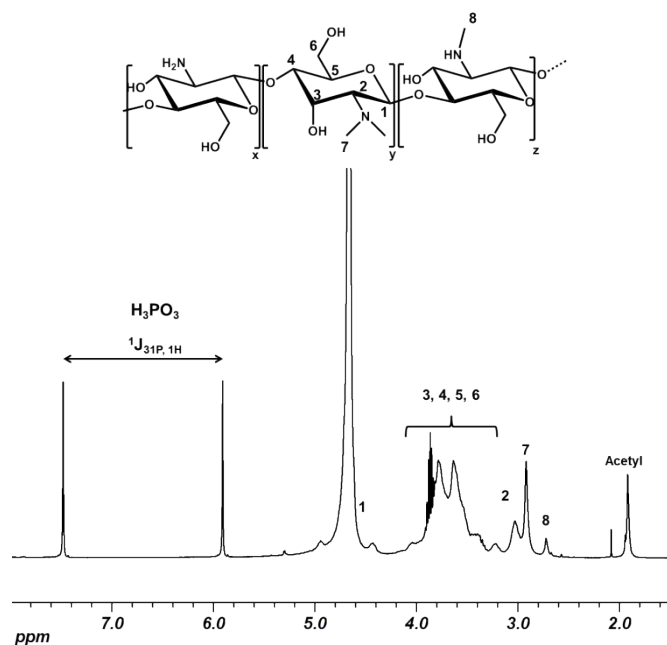

Figure S2:  $^1\text{H}$ -NMR spectra of compound (I) (run 2) in  $\text{D}_2\text{O}$  at 25 °C.

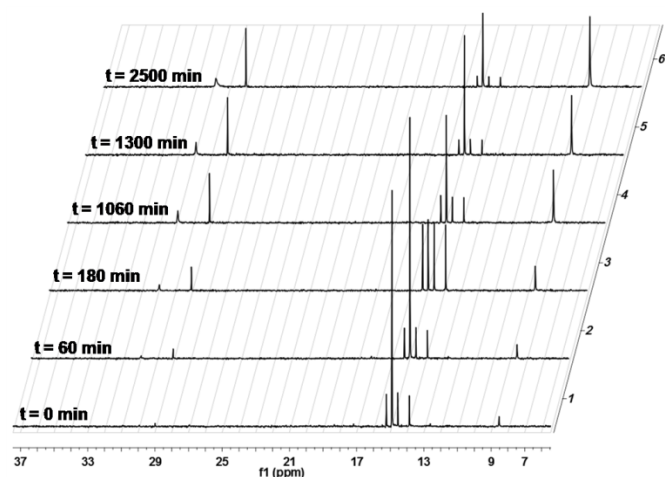

Figure S3:  $^{31}\text{P}$ -NMR spectra at different times of the Kabachnik-Fields reaction carried at  $40^\circ\text{C}$ .

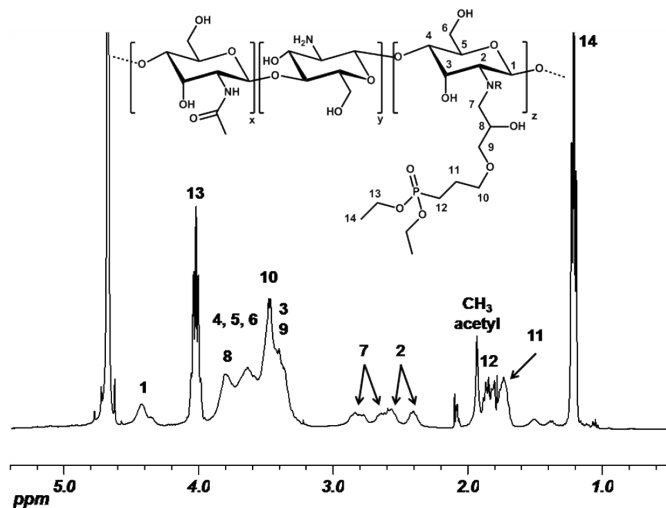

Figure S4:  $^1\text{H}$  NMR spectrum of (IV) in  $\text{D}_2\text{O}$  at  $25^\circ\text{C}$ .

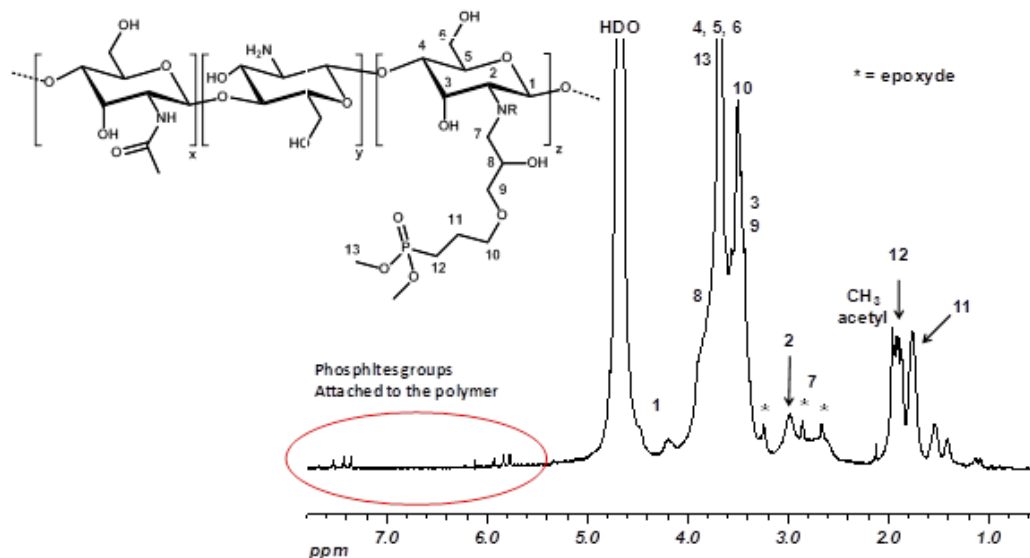

Figure S5:  $^1\text{H}$  NMR of (V) in  $\text{D}_2\text{O}$  at  $25^\circ\text{C}$ .

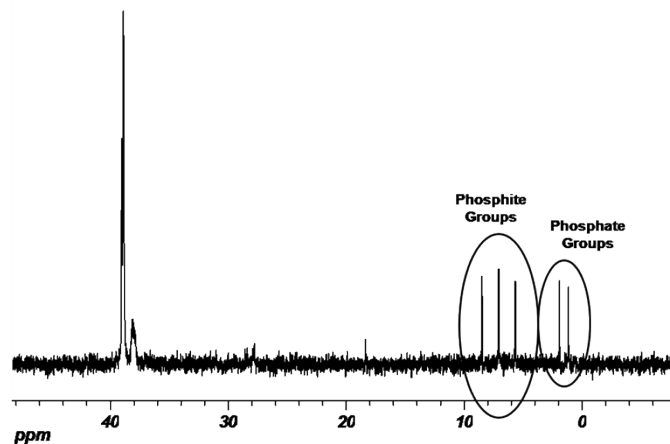

Figure S6:  $^{31}\text{P}$ -NMR spectrum of (V) (run 2) in  $\text{D}_2\text{O}$  at  $25^\circ\text{C}$ .
